# Supplementary material for: Phenotypic and Genotypic Characterization of Recently Isolated Multidrug-Resistant Acinetobacter baumannii Clinical and Aquatic Strains and Demonstration of Silver Nanoparticle Potency
Source: MDPI journal article supplement (doi:10.3390/microorganisms11102439), 2023-09-28
Supplement: s1 [file s1]

## Supplementary Material

### Phenotypic and genotypic characterization of recently isolated multidrug resistant *Acinetobacter baumannii* clinical and aquatic strains and demonstration of silver nanoparticles potency

Irina Gheorghe-Barbu <sup>†1,2</sup>, Viorica Maria Corbu<sup>\*1,2</sup>, Corneliu Ovidiu Vrancianu <sup>†1,2,3</sup>, Ioana Cristina Marinas <sup>†1</sup>, Marcela Popa<sup>1,2</sup>, Andreea Ștefania Dumbravă<sup>1,2</sup>, Mihai Niță-Lazar<sup>1</sup>, Ionut Pecete<sup>1</sup>, Andrei Alexandru Muntean<sup>1,2</sup>, Mircea Ioan Popa<sup>1,2</sup>, Liliana Marinescu<sup>1</sup>, Denisa Ficai<sup>1</sup>, Anton Ficai<sup>1</sup> and Ilda Czobor Barbu<sup>1,2</sup>

#### S1. Supplementary Figures and Tables

##### S1.1. Supplementary Figures

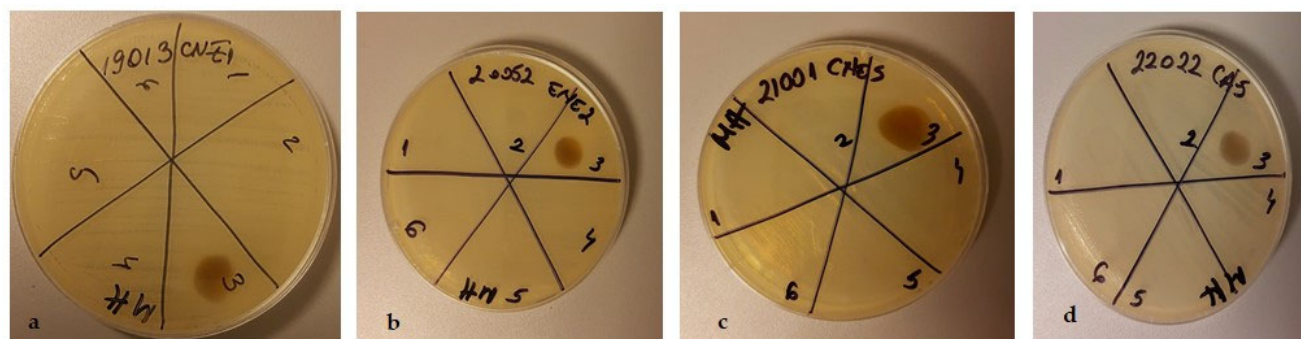

**Supplementary Figure S1.** Disk diffusion screening assays of the antimicrobial activity of the AgNPs ((1-AgNPs; 2-AgNPt; 3-AgNPsol; 4-AuNP; 5-CuNP; 6-ZnONP) against *A. baumannii* strains isolated in 2019 (a); 2020 (b); 2021 (c) and from WW and SW samples.

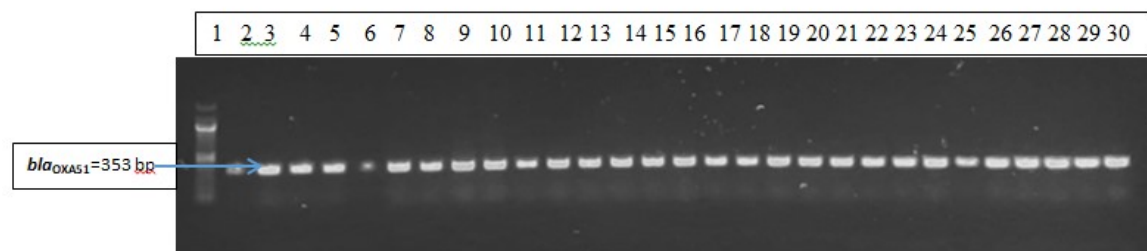

**Supplementary Figure S2.** Electrophoresis gel for *bla*<sub>OXA-51</sub> (353 bp) gene detection: all *A. baumannii* strains were positive. Lines: 1- Molecular Size Marker (ThermoScientific, 1500 bp); 2- strain 19012 ENE2; 3- 19042 CNE3; 4-111; 5- 21018 CNE6; 6- 21010 ONE3; 7-22014CA2; 8-19015 CNE2; 9-19013 ONE1; 10- 19014 CNE2; 11- 20031 ONE5; 12- 22019CNE5; 13-22018 CA6; 14-20030 ONE3; 15-21045 CNE6; 16-21049 ENE3; 17-21012 CNE5; 18-22012 CA5; 19-20070 ENE4; 20-19059 ENE1; 21-19060 ENE2; 22- 20070 ENE4; 23-Ab62 VL; 24-21002 CNE4; 25-21001 CNE5; 26-22007 CA4; 27- 19022 CNE4; 28-22025 CA5; 29-Ab82 VL; 30- *A. baumannii* positive control for *bla*<sub>OXA-51</sub> gene.

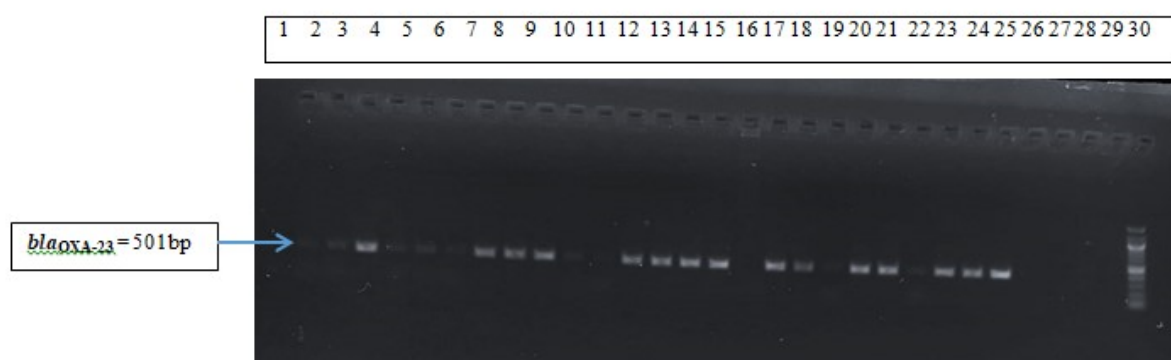

**Supplementary Figure S3.** Electrophoresis gel for *bla*<sub>OXA-23</sub> (501 bp) gene detection: 20 *A. baumannii* strains were positive. Lines: 2- strain 19012 ENE2; 3- 111; 4-21010 ONE3; 5- 19015 CNE2; 6-19013 ONE1; 7-19014 CNE2; 8-20031 ONE5; 9-21045 CNE6; 10-21012 CNE5; 11-19045 ENE5; 12-21002 CNE4; 13-21001 CNE5; 14-20056 CNE2; 15-20113 ENE3; 16-22018 CA6; 17-19003 CNE1; 18-21036 CNE4; 19-22004 CA3; 20-22003 ENE2; 21-22014 CA2; 22-22025 CA5; 23-21018 CNE6; 24-20070 ENE4; 25- 19094 CNE1; 26-22004 CA3; 27-21030 ENE4; 28-22006 CA3; 29-19051 ENE2; 30 –negative control; Molecular Size Marker (ThermoScientific, 1500 bp).

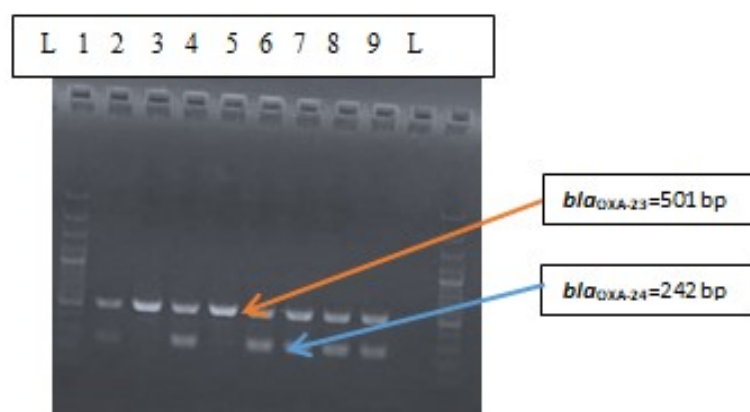

**Supplementary Figure S4.** Electrophoresis gel for *bla*<sub>OXA-23</sub> (501 bp) and *bla*<sub>OXA-24</sub> (242 bp) genes detection: 5 strain of *A. baumannii* encoded BL3Aba11; 30 Trg; 111; 21018 CNE6; 22014 CA2 were positives. Lines: 1- Molecular Size Marker (ThermoScientific, 1500 bp); 2- strain BL3Aba11; 3- strain 22018 CA6; 4- strain 30 Trg; 5- 19060 ENE2; 6- 111; 7-21018 CNE6; 8- 22014 CA2; 9- *A. baumannii* positive control for *bla*<sub>OXA-23</sub> and *bla*<sub>OXA-24</sub> genes.

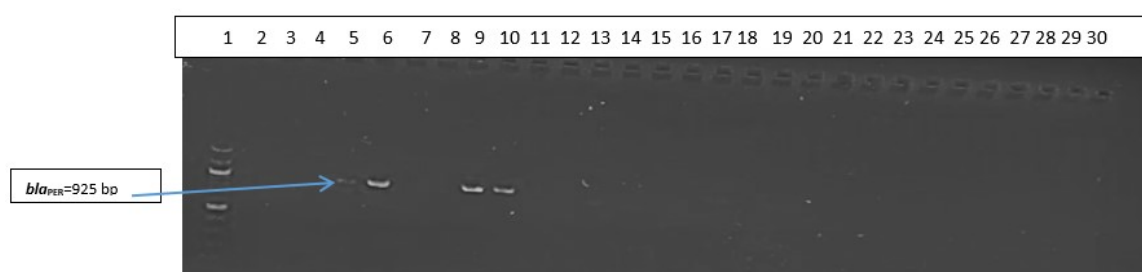

**Supplementary Figure S5.** Electrophoresis gel for *bla*<sub>PER</sub> (925 bp) gene detection: 3 strain of *A. baumannii* encoded 21039 CNE5; 21030 ENE4; 21030 CNE3 were positive. Lines: 1- Molecular Size Marker (ThermoScientific, 1500 bp); 2- strain

22025 CA5; 3- strain 22028 CNE2; 4- strain 19001 CNE1; ; 5- 21039 CNE5; 6-21030ENE4; 7- 19094 CNE6; 8-19094 CNE5; 9-21030 CNE3; 10- *A. baumannii* positive control for *bla<sub>PER</sub>* gene; 11- 19003 CNE1; 12- 21036 CNE4; 13- 22028 CNE6; 14- 19091 ENE4; 15- 19094 CNE1; 16- 19094 ENE5; 17- 22003 ENE2; 18- 22002 COLN3; 19- 19005 CNE2; 20- 19001 CNE1; 21- 20018 ENE4; 22- DF 0965; 23- DF 0462; 24- 19052 ENE2; 25- 21002 CNE2; 26- 20029 ONE2; 27- 22019 CNE4; 28- 19018 CNE2; 29- 20029 ONE2; 30-negative control.

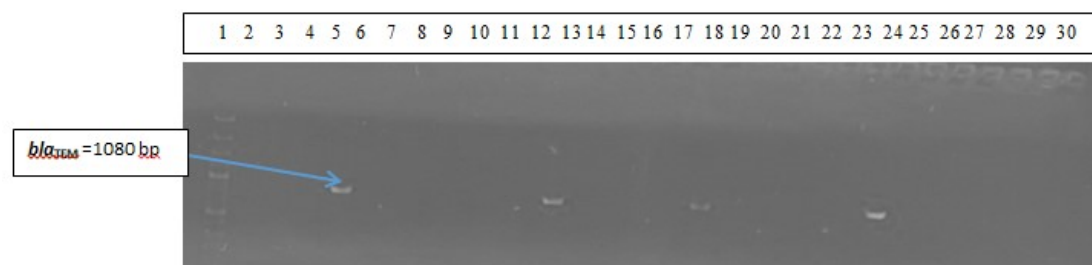

**Supplementary Figure S6.** Electrophoresis gel for *bla<sub>TEM</sub>* (1080 bp) gene detection: 3 strains of *A. baumannii* encoded 22025 CA5; 22026 CNE1; 19016 ONE4 were positive. Lines: 1- Molecular Size Marker (ThermoScientific, 1500 bp); 2- strain 20018 CNE3; 3-20015 CNE3; 4-20085 CNE5; 5- 22025 CA5; 6-20084 CNE2; 7-20018 ENE4; 8-21035 CNE6; 9-21036 ENE2; 10-21036 ONE3; 11-21036 CNE4; 12-22026 CNE1; 13-21039 CNE5; 14-22028 CNE2; 15-22028 ENE5; 16-19016 ONE3; 17-20034 CNE4; 18-19016 ONE4; 19-21020 CNE1; 20-22019 CNE5; 21-BL3Aba 5; 22-19044 CNE6; 23-21012 CNE3; 24- *A. baumannii* positive control for *bla<sub>TEM</sub>* gene; 25- 21017 CNE3; 26- 22015 CA3; 20070 ENE4; 27- 19022 CNE4; 28- 22022 CA5; 29-20056 CNE2; 30- negative control.

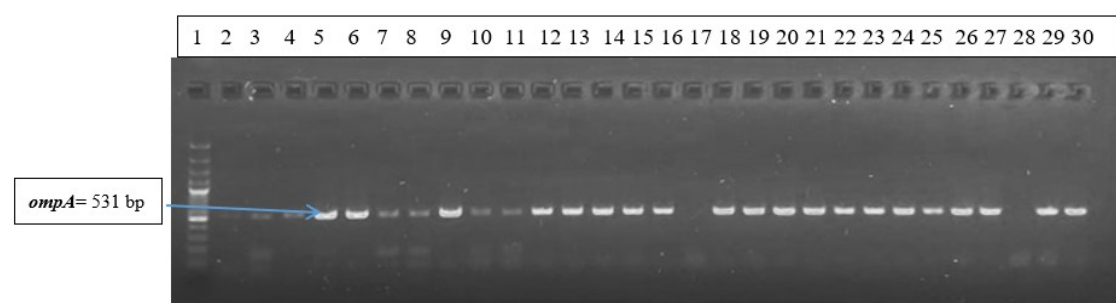

**Supplementary Figure S7.** Electrophoresis gel for *ompA* (531 bp) gene detection: 26 *A. baumannii* strains were positive. Lines: 1- Molecular Size Marker (ThermoScientific, 1500 bp); 2- strain BL3Aba5; 3-30 Trg; 4-Ab 62 VL; 5-21012 CNE5; 6-21012 CA5; 7-20070 ENE4; 8-20069 ENE1; 9-19059 ENE1; 10-19060 ENE2; 11-19045 ENE5; 12-19012 ENE2; 13- 19042 CNE3; 14-111; 15-21018 CNE6; 16-22026 CNE1; 17- 21049 ENE3; 18- 21010 ONE3; 19-22014 CA2; 20-19015 CNE2; 21-19013 ONE1; 22-19014 CNE2; 23-20031 ONE5; 24-22019 CNE5; 25-22018 CA6; 26-20030 ONE3; 27- 21045 CNE6; 28- 22025 CA5; 29-21039 CNE5; 30- *A. baumannii* positive control for *ompA* gene.

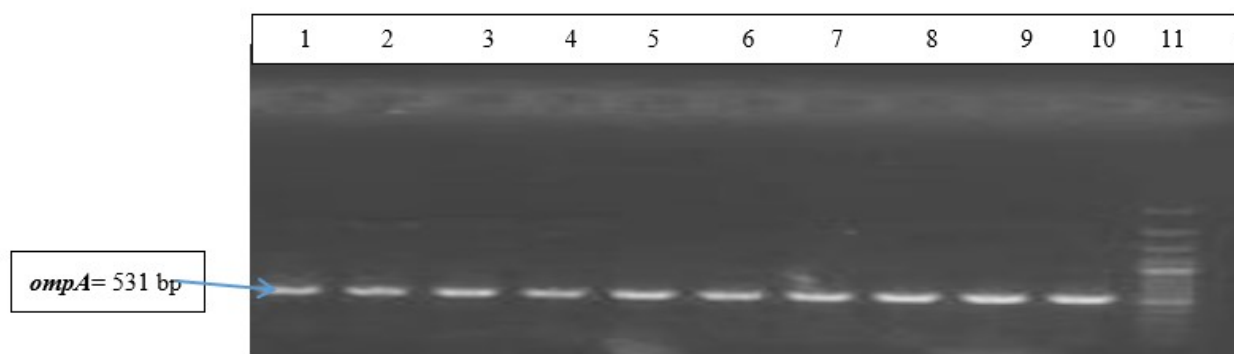

**Supplementary Figure S8.** Electrophoresis gel for *ompA* (531 bp) gene detection: 9 *A. baumannii* strains were positive. Lines: 1-strain 19003 CNE1; 2-20085 CNE3; 3-21036 CNE4; 4-22028 CNE6; 5-19094 CNE6; 6- 22003 ENE2; 7- 19051 ENE2; 8-22006 CA3; 9- 21001 CNE5; 10-*A. baumannii* positive control for *ompA* gene; 11- Molecular Size Marker (ThermoScientific, 1500 bp).

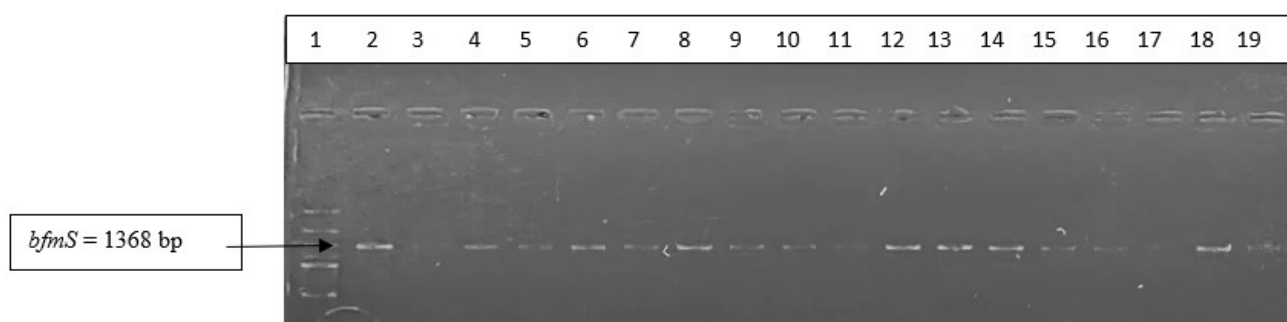

**Supplementary Figure S9.** Electrophoresis gel for *bfmS* (1368 bp) gene detection: 15 *A. baumannii* strains were positive. Lines: 1- Molecular Size Marker (ThermoScientific, 1500 bp); 2- strain BL3Aba5; 3-30 Trg; 4-Ab 62 VL; 5-21012 CNE5; 6- 22012 CA5; 7-20070 ENE4; 8-20069 ENE1; 9-19059 ENE1; 10-19060 ENE2; 11-19045 ENE5; 12-19012 ENE2; 13- 19042 CNE3; 14-111; 15-21018 CNE6; 16-21010 ONE3; 17- 22014 CA2; 18- *A. baumannii* positive control for *bfmS* gene; 19-19015 CNE2.

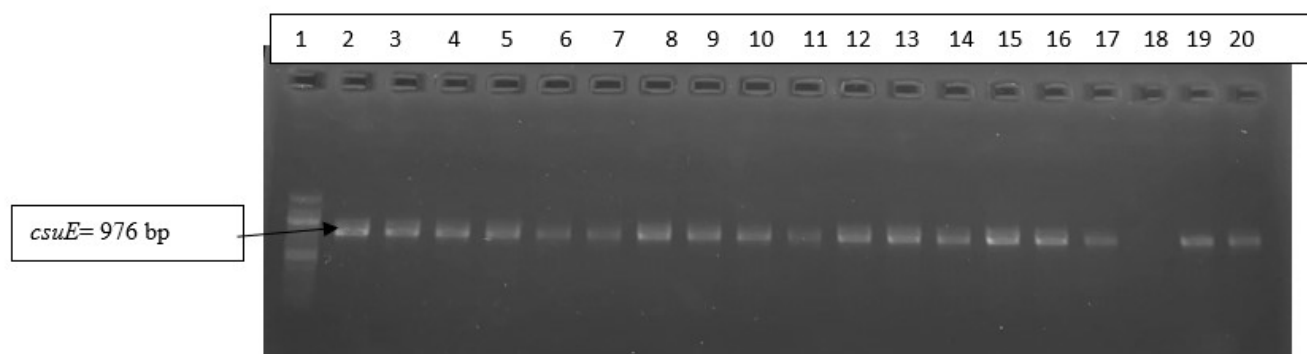

**Supplementary Figure S10.** Electrophoresis gel for *csuE* (976 bp) gene detection: 18 *A. baumannii* strains were positive. Lines: 1- Molecular Size Marker (ThermoScientific, 1500 bp); 2- strain BL3Aba5; 3-21012 CNE5; 4-22012 CA5; 5-20070 ENE4; 6-20069 ENE1; 7- 19059 ENE1; 8-19060 ENE2; 9-19045 ENE5; 10-19012 ENE2; 11-19042 CNE3; 12-21018 CNE6; 13-21010 ONE3; 14-21010 ONE3; 15-22014 CA2; 16-19015 CNE2; 17-19013 ONE1; 18-111; 19-19014 CNE2; 20- *A. baumannii* positive control for *csuE* gene.

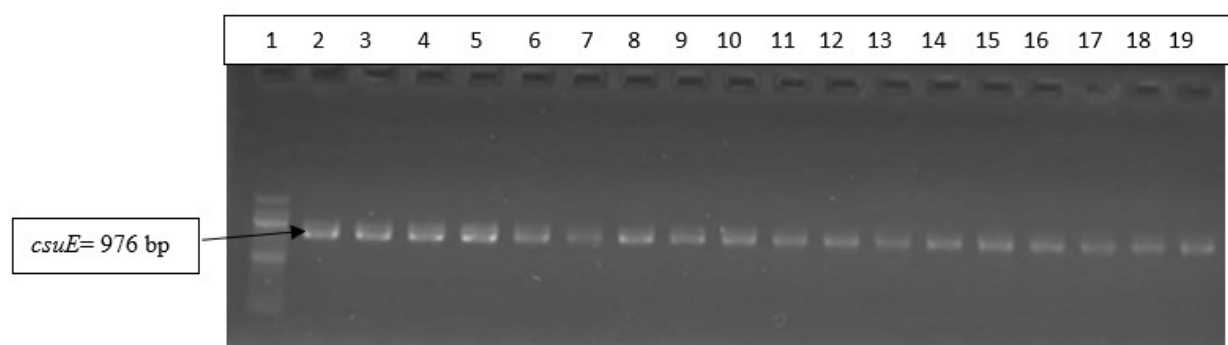

**Supplementary Figure S11.** Electrophoresis gel for *csuE* (976 bp) gene detection: 17 *A. baumannii* strains were positive. Lines: 1- Molecular Size Marker (ThermoScientific, 1500 bp); 2-20031 ONE5; 3-22019 CNE5; 4-22018 CA6; 5-22025 CA5; 6-21039 CNE5; 7-22026 CNE1; 8-21030 ENE4; 9- 19003 CNE1; 10-21036 CNE4; 11-22028 CNE6; 12-19091 ENE4; 13-22003 ENE2; 14-19051 ENE2; 15-20056 CNE2; 16-22006 CA3; 17-20113 ENE3; 18-22022 CA5; 19- *A. baumannii* positive control for *csuE* gene.

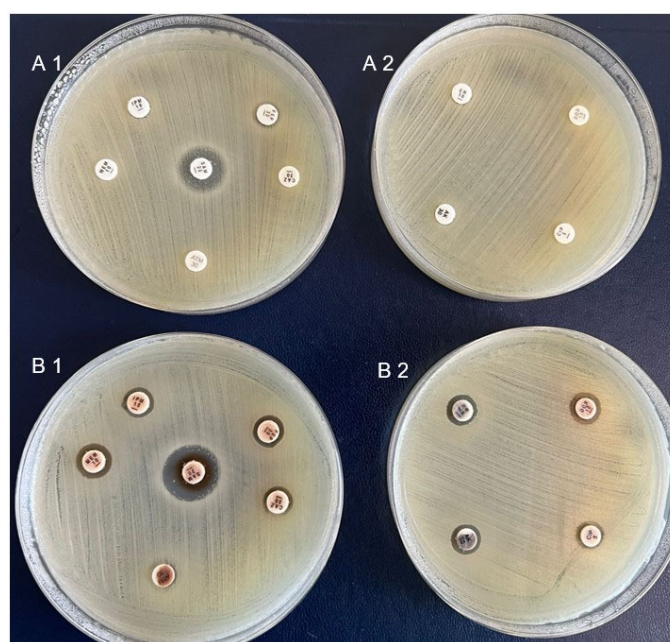

**Supplementary Figure S12.** Disk diffusion screening assays of the synergic antimicrobial activity of the Ag NPsol and antibiotics (IMP, SAM, MEM, CAZ, ATM, FEP, CN, DOR, CIP and AK) against *A. baumannii* strains isolated in 2020 from WW samples (N-E Romania): A1 and A2 correspond to 20085 CNE5 strain disc diffusion assay and respectively B1 and B2 to synergistic activity between antibiotics and Ag NPsol (5 µL).

## S1.2. Supplementary Tables

Supplementary Table S1. *A. baumannii* strains investigated in the study.

| Strain code      | Isolation source   | Year of isolation | Geographical region, location | Strain code        | Isolation source | Year of isolation | Geographical region, location |      |      |     |      |     |      |
|------------------|--------------------|-------------------|-------------------------------|--------------------|------------------|-------------------|-------------------------------|------|------|-----|------|-----|------|
| 30 TRG           | IHI                | 2019              | Southern, Targoviste          | 19094 ENE5         | WWs              | 2019              | North-Eastern, Iasi           |      |      |     |      |     |      |
| 80 TRG           | SWs                |                   |                               | 19091 ENE4         |                  |                   |                               | IHI  | 2020 |     |      |     |      |
| 19016 ONE4 (T19) |                    |                   |                               | 19094 CNE1         |                  |                   |                               |      |      | WWs | 2021 |     |      |
| 19016 ONE5 (T20) |                    |                   |                               | 19094 CNE6         |                  |                   |                               |      |      |     |      | SWs | 2022 |
| 19016 ONE3       |                    |                   |                               | 19094 CNE5         |                  |                   |                               |      |      |     |      |     |      |
| 19016 CNE2       |                    |                   |                               | 88 Ab Iasi (Ab 26) | WWs              | 2021              |                               |      |      |     |      |     |      |
| 19015 CNE2       | 20006 CNE6 (Ab13)  |                   |                               | SWs                |                  |                   |                               | 2022 |      |     |      |     |      |
| 19013 ONE1       | 20096 CNE2 (Ab28)  |                   |                               |                    | SWs              | 2022              |                               |      |      |     |      |     |      |
| 19015 CNE6       | 20096 ONE4 (Ab35)  |                   |                               | SWs                |                  |                   |                               | 2022 |      |     |      |     |      |
| 19013 CNE1       | 21030 CNE3 (Ab14)  |                   |                               |                    | SWs              | 2022              |                               |      |      |     |      |     |      |
| 19014 CNE1       | 21030 ENE4 (Ab 13) |                   |                               | SWs                |                  |                   |                               | 2022 |      |     |      |     |      |
| 19014 CNE4       | 22003 ENE2         |                   |                               |                    | SWs              | 2022              |                               |      |      |     |      |     |      |
| 19018 CNE2       | 22002 CA5          |                   |                               | SWs                |                  |                   |                               | 2022 |      |     |      |     |      |
| 19018 CNE4       | 22002 COLN3        |                   |                               |                    | SWs              | 2022              |                               |      |      |     |      |     |      |
| 19014 ENE4       | 19005 CNE2         |                   |                               | SWs                |                  |                   | 2022                          |      |      |     |      |     |      |
| 20034 CNE4 (T72) | 19003 CNE6         | SWs               | 2022                          |                    |                  |                   |                               |      |      |     |      |     |      |
| 20029 ENE1 (T38) | 19003 CNE1         |                   |                               | SWs                | 2022             |                   |                               |      |      |     |      |     |      |
| 20029 CNE2 (T45) | 19006 CNE5         | SWs               | 2022                          |                    |                  |                   |                               |      |      |     |      |     |      |
| 20029 ONE2 (T42) | 19001 CNE1         |                   |                               | SWs                | 2022             |                   |                               |      |      |     |      |     |      |
| 21019 ONE2 (T26) | 19006 ONE1         | SWs               | 2022                          |                    |                  |                   |                               |      |      |     |      |     |      |
| 21020 CNE1 (T23) | 19001 ONE1         |                   |                               | SWs                | 2022             |                   |                               |      |      |     |      |     |      |
| 21020 ONE3 (T22) | 20018 CNE3 (Ab95)  | SWs               | 2022                          |                    |                  |                   |                               |      |      |     |      |     |      |
| 21020 CNE5 (T21) | 20015 CNE3 (Ab91)  |                   |                               | SWs                | 2022             |                   |                               |      |      |     |      |     |      |
| 22019 CNE5       | 20085 CNE5 (Ab113) | SWs               | 2022                          |                    |                  |                   |                               |      |      |     |      |     |      |
| 22018 CA5        | 20084 CNE2 (Ab109) |                   |                               | SWs                | 2022             |                   |                               |      |      |     |      |     |      |
| 22018 CA6        | 20018 ENE4 (Ab93)  | SWs               | 2022                          |                    |                  |                   |                               |      |      |     |      |     |      |
| 22019 CNE4       | 21035 CNE6         |                   |                               | SWs                | 2022             |                   |                               |      |      |     |      |     |      |
| BL3Aba 5         | 21036 ENE2         | SWs               | 2022                          |                    |                  |                   |                               |      |      |     |      |     |      |
| BL3Aba 11        | 21036 ONE3         |                   |                               | SWs                | 2022             |                   |                               |      |      |     |      |     |      |
| 19045 ENE5       | 21036 CNE4         | SWs               | 2022                          |                    |                  |                   |                               |      |      |     |      |     |      |
| 19045 ENE2       | 21039 CNE5         |                   |                               | SWs                | 2022             |                   |                               |      |      |     |      |     |      |
| 19044 CNE6       | 22025 CA5          | SWs               | 2022                          |                    |                  |                   |                               |      |      |     |      |     |      |
| 19044 CNE5       | 22028 CNE2         |                   |                               | SWs                | 2022             |                   |                               |      |      |     |      |     |      |
| 19042 CNE6       | 22028 ENE5         | SWs               | 2022                          |                    |                  |                   |                               |      |      |     |      |     |      |
| 19011 CNE6       | 22028 CNE6         |                   |                               | SWs                | 2022             |                   |                               |      |      |     |      |     |      |
| 19012 ENE2       | DF 0965            | IHI               |                               |                    |                  |                   |                               |      |      |     |      |     |      |
| 19042 CNE3       | DF 0462            |                   |                               | IHI                |                  |                   |                               |      |      |     |      |     |      |

|                    |            |            |                     |            |     |      |                               |
|--------------------|------------|------------|---------------------|------------|-----|------|-------------------------------|
| 111                | IHI        | 2020       |                     | 19051 ENE2 | SWs | 2019 |                               |
| 108                |            |            |                     | 19049 ENE4 | WWs |      |                               |
| 110                |            |            |                     | 19049 ENE1 |     |      |                               |
| 109                |            |            |                     | 19052 ENE2 |     |      |                               |
| 21012 CNE3 (Ab50)  | SWs        | 2021       |                     | 20056 CNE2 | SWs | 2020 |                               |
| 21012 CNE5 (Ab 51) |            |            |                     | 20056 ENE4 |     |      |                               |
| 21012 ONE2 (Ab53)  |            |            |                     | 20054 CNE4 | WWs |      |                               |
| 21010 ONE1         | 20052 ENE2 |            |                     |            |     |      |                               |
| 21018 CNE6         | 20103 ENE4 |            |                     |            |     |      |                               |
| 21017 CNE3         | WWs        |            |                     | 20039 ONE1 | WWs |      |                               |
| 21010 CNE3         |            | 20039 CNE5 |                     |            |     |      |                               |
| 21018 CNE1         |            | 20104 CNE5 |                     |            |     |      |                               |
| 21009 CNE1         |            | 21002 CNE4 | WWs                 | 2021       |     |      |                               |
| 22012 ENE6         | 21001 CNE1 |            |                     |            |     |      |                               |
| 22012 CA5          | 21002 CNE2 |            |                     |            |     |      |                               |
| 22013 ENE4         | WWs        | 2022       |                     | 21001 CNE5 | SWs | 2022 |                               |
| 22014 ENE5         |            |            |                     | 22005 ENE1 |     |      |                               |
| 22014 CA2          |            |            |                     | 22005 ENE4 |     |      |                               |
| 22015 CA4          |            |            |                     | 22005 CA3  |     |      |                               |
| 22015 CA3          |            |            |                     | 22006 CA2  |     |      |                               |
| 22013 CA5          |            |            |                     | 22007 CA3  | WWs |      |                               |
| Ab62 VL            | IHI        | 2019       | Southern,<br>Valcea | 22007 CA2  |     |      |                               |
| Ab82 VL            |            |            |                     | 22007 CA4  |     |      |                               |
| 19059 ENE1         | SWs        |            |                     | 19022 CNE6 | WWs | 2019 | Central-Western,<br>Timisoara |
| 19060 ENE2         | WWs        |            |                     | 19022 CNE4 | SWs |      |                               |
| 19058 ENE1         | SWs        |            |                     | 20113 ENE3 | WWs | 2020 |                               |
| 19062 ENE1         |            |            |                     | 22022 CA5  | WWs | 2022 |                               |
| 20070 ENE4 (Ab 60) | SWs        | 2020       |                     |            |     |      |                               |
| 20069 ENE1 (Ab 59) | WWs        |            |                     |            |     |      |                               |
| 20073 ENE3 (Ab 68) | WWs        | 2021       |                     |            |     |      |                               |
| 21049 ENE3         | WWs        |            |                     |            |     |      |                               |

**Supplementary Table S2.** Summary of the interaction of the Ag NPsol and the various antibiotics.

| Laboratory code | Isolation code | Geographical region | Antibiotics | Antibiotic alone (mm) | Antibiotic with Ag NP (mm) | % change in IZD | Interpretation |
|-----------------|----------------|---------------------|-------------|-----------------------|----------------------------|-----------------|----------------|
| 18              | 21036CNE4      | WWs N-E             | IMP         | 6                     | 9                          | 50              | Synergism      |
|                 |                |                     | SAM         | 6                     | 12                         | 100             | Synergism      |
|                 |                |                     | MEM         | 6                     | 11                         | 83.33           | Synergism      |
|                 |                |                     | CAZ         | 6                     | 8                          | 33.33           | Synergism      |
|                 |                |                     | ATM         | 15                    | 15                         | 0               | Indifference   |
|                 |                |                     | FEP         | 10                    | 10                         | 0               | Indifference   |
|                 |                |                     | CN          | 6                     | 6                          | 0               | Indifference   |



|    |            |         |     |    |    |        |              |
|----|------------|---------|-----|----|----|--------|--------------|
|    |            |         | DOR | 6  | 6  | 0      | Indifference |
|    |            |         | CIP | 6  | 11 | 83.33  | Synergism    |
|    |            |         | AK  | 6  | 7  | 16.67  | Additive     |
| 19 | 20085 CNE3 | WWs N-E | IMP | 6  | 8  | 33.33  | Synergism    |
|    |            |         | SAM | 6  | 11 | 83.33  | Synergism    |
|    |            |         | MEM | 6  | 10 | 66.67  | Synergism    |
|    |            |         | CAZ | 6  | 8  | 33.33  | Synergism    |
|    |            |         | ATM | 6  | 6  | 0      | Indifference |
|    |            |         | FEP | 6  | 9  | 50     | Synergism    |
|    |            |         | CN  | 6  | 9  | 50     | Synergism    |
|    |            |         | DOR | 6  | 9  | 50     | Synergism    |
|    |            |         | CIP | 6  | 7  | 16.67  | Additive     |
| 4  | 22028CNE4  | WWs N-E | IMP | 6  | 9  | 50     | Synergism    |
|    |            |         | SAM | 14 | 14 | 0      | Indifference |
|    |            |         | MEM | 6  | 9  | 50     | Synergism    |
|    |            |         | CAZ | 12 | 14 | 16.67  | Additive     |
|    |            |         | ATM | 15 | 16 | 6.67   | Additive     |
|    |            |         | FEP | 15 | 15 | 0      | Indifference |
|    |            |         | CN  | 6  | 8  | 33.33  | Synergism    |
|    |            |         | DOR | 6  | 6  | 0      | Indifference |
|    |            |         | CIP | 6  | 6  | 0      | Indifference |
| 27 | 19003CNE1  | WWs N-E | IMP | 6  | 8  | 33.33  | Synergism    |
|    |            |         | SAM | 6  | 14 | 133.33 | Synergism    |
|    |            |         | MEM | 6  | 8  | 33.33  | Synergism    |
|    |            |         | CAZ | 6  | 8  | 33.33  | Synergism    |
|    |            |         | ATM | 12 | 13 | 8.33   | Additive     |
|    |            |         | FEP | 10 | 11 | 10     | Additive     |
|    |            |         | CN  | 6  | 7  | 16.67  | Additive     |
|    |            |         | DOR | 6  | 8  | 33.33  | Synergism    |
|    |            |         | CIP | 6  | 6  | 0      | Indifference |
| 33 | 22003ENE2  | WWs N-E | IMP | 6  | 8  | 33.33  | Synergism    |
|    |            |         | SAM | 6  | 13 | 116.67 | Synergism    |
|    |            |         | MEM | 6  | 8  | 33.33  | Synergism    |
|    |            |         | CAZ | 14 | 10 | -28.57 | Antagonism   |
|    |            |         | ATM | 14 | 13 | -7.14  | Antagonism   |
|    |            |         | FEP | 11 | 12 | 9.09   | Additive     |
|    |            |         | CN  | 6  | 7  | 16.67  | Additive     |
|    |            |         | DOR | 6  | 8  | 33.33  | Synergism    |
|    |            |         | CIP | 6  | 7  | 16.67  | Additive     |
| 29 | 19094CNE6  | WWs N-E | IMP | 6  | 7  | 16.67  | Additive     |
|    |            |         | SAM | 11 | 13 | 18.18  | Additive     |
|    |            |         | MEM | 6  | 7  | 16.67  | Additive     |
|    |            |         | CAZ | 6  | 11 | 83.33  | Synergism    |
|    |            |         | ATM | 13 | 16 | 23.08  | Synergism    |
|    |            |         | FEP | 15 | 14 | -6.67  | Antagonism   |
|    |            |         | CN  | 6  | 7  | 16.67  | Additive     |
|    |            |         | DOR | 6  | 7  | 16.67  | Additive     |
|    |            |         | CIP | 6  | 7  | 16.67  | Additive     |
| 30 | 22004CA3   | WWs N-E | IMP | 32 | 34 | 6.25   | Additive     |
|    |            |         | SAM | 30 | 40 | 33.33  | Synergism    |



|    |            |         |     |    |    |        |              |
|----|------------|---------|-----|----|----|--------|--------------|
|    |            |         | MEM | 30 | 32 | 6.67   | Additive     |
|    |            |         | CAZ | 24 | 24 | 0      | Indifference |
|    |            |         | ATM | 19 | 24 | 26.32  | Synergism    |
|    |            |         | FEP | 24 | 30 | 25     | Synergism    |
|    |            |         | CN  | 20 | 21 | 5      | Additive     |
|    |            |         | DOR | 30 | 31 | 3.33   | Additive     |
|    |            |         | CIP | 28 | 31 | 10.71  | Additive     |
|    |            |         | AK  | 20 | 20 | 0      | Indifference |
| 31 | 19091ENE4  | WWs N-E | IMP | 32 | 34 | 6.25   | Additive     |
|    |            |         | SAM | 30 | 30 | 0      | Indifference |
|    |            |         | MEM | 30 | 30 | 0      | Indifference |
|    |            |         | CAZ | 24 | 24 | 0      | Indifference |
|    |            |         | ATM | 19 | 18 | -5.26  | Antagonism   |
|    |            |         | FEP | 28 | 26 | -7.14  | Antagonism   |
|    |            |         | CN  | 19 | 21 | 10.53  | Additive     |
|    |            |         | DOR | 28 | 28 | 0      | Indifference |
|    |            |         | CIP | 28 | 29 | 3.57   | Additive     |
|    |            |         | AK  | 19 | 20 | 5.26   | Additive     |
| 1  | 21039CNE 5 | SWs N-E | IMP | 6  | 8  | 33.33  | Synergism    |
|    |            |         | SAM | 6  | 6  | 0      | Indifference |
|    |            |         | MEM | 6  | 10 | 66.67  | Synergism    |
|    |            |         | CAZ | 6  | 10 | 66.67  | Synergism    |
|    |            |         | ATM | 12 | 11 | -8.33  | Antagonism   |
|    |            |         | FEP | 6  | 9  | 50     | Synergism    |
|    |            |         | CN  | 6  | 8  | 33.33  | Synergism    |
|    |            |         | DOR | 6  | 9  | 50     | Synergism    |
|    |            |         | CIP | 6  | 9  | 50     | Synergism    |
|    |            |         | AK  | 9  | 10 | 11.11  | Additive     |
| 2  | 22026CNE1  | SWs N-E | IMP | 6  | 9  | 50     | Synergism    |
|    |            |         | SAM | 14 | 13 | -7.14  | Antagonism   |
|    |            |         | MEM | 6  | 10 | 66.67  | Synergism    |
|    |            |         | CAZ | 6  | 8  | 33.33  | Synergism    |
|    |            |         | ATM | 14 | 13 | -7.14  | Antagonism   |
|    |            |         | FEP | 15 | 8  | -46.67 | Antagonism   |
|    |            |         | CN  | 6  | 9  | 50     | Synergism    |
|    |            |         | DOR | 6  | 7  | 16.67  | Additive     |
|    |            |         | CIP | 6  | 8  | 33.33  | Synergism    |
|    |            |         | AK  | 8  | 11 | 37.5   | Synergism    |
| 3  | 22025CA5   | SWs N-E | IMP | 34 | 32 | -5.88  | Antagonism   |
|    |            |         | SAM | 24 | 30 | 25     | Synergism    |
|    |            |         | MEM | 28 | 30 | 7.14   | Additive     |
|    |            |         | CAZ | 24 | 25 | 4.17   | Additive     |
|    |            |         | ATM | 20 | 20 | 0      | Indifference |
|    |            |         | FEP | 26 | 26 | 0      | Indifference |
|    |            |         | CN  | 21 | 21 | 0      | Indifference |
|    |            |         | DOR | 26 | 26 | 0      | Indifference |
|    |            |         | CIP | 26 | 29 | 11.54  | Additive     |
|    |            |         | AK  | 20 | 21 | 5      | Additive     |
| 32 | 21030CNE3  | SWs N-E | IMP | 6  | 7  | 16.67  | Additive     |
|    |            |         | SAM | 19 | 20 | 5.26   | Additive     |
|    |            |         | MEM | 6  | 7  | 16.67  | Additive     |
|    |            |         | CAZ | 6  | 7  | 16.67  | Additive     |
|    |            |         | ATM | 15 | 15 | 0      | Indifference |
|    |            |         | FEP | 16 | 15 | -6.25  | Antagonism   |
|    |            |         | CN  | 8  | 9  | 12.5   | Additive     |
|    |            |         | DOR | 6  | 8  | 33.33  | Synergism    |

|    |                 |         |     |    |    |        |              |
|----|-----------------|---------|-----|----|----|--------|--------------|
|    |                 |         | CIP | 6  | 7  | 16.67  | Additive     |
|    |                 |         | AK  | 6  | 7  | 16.67  | Additive     |
|    |                 |         |     |    |    |        |              |
| 44 | 21030ENE4       | SWs N-E | IMP | 11 | 11 | 0      | Indifference |
|    |                 |         | SAM | 26 | 29 | 11.54  | Additive     |
|    |                 |         | MEM | 9  | 10 | 11.11  | Additive     |
|    |                 |         | CAZ | 20 | 21 | 5      | Additive     |
|    |                 |         | ATM | 17 | 19 | 11.77  | Additive     |
|    |                 |         | FEP | 22 | 22 | 0      | Indifference |
|    |                 |         | CN  | 17 | 21 | 23.53  | Synergism    |
|    |                 |         | DOR | 8  | 10 | 25     | Synergism    |
|    |                 |         | CIP | 27 | 27 | 0      | Indifference |
|    |                 |         | AK  | 14 | 19 | 35.71  | Synergism    |
|    |                 |         |     |    |    |        |              |
| 9  | BL3ABA5         | IHI S   | IMP | 6  | 10 | 66.67  | Synergism    |
|    |                 |         | SAM | 6  | 8  | 33.33  | Synergism    |
|    |                 |         | MEM | 6  | 9  | 50     | Synergism    |
|    |                 |         | CAZ | 6  | 8  | 33.33  | Synergism    |
|    |                 |         | ATM | 12 | 8  | -33.33 | Antagonism   |
|    |                 |         | FEP | 6  | 8  | 33.33  | Synergism    |
|    |                 |         | CN  | 6  | 9  | 50     | Synergism    |
|    |                 |         | DOR | 6  | 8  | 33.33  | Synergism    |
|    |                 |         | CIP | 6  | 7  | 16.67  | Additive     |
|    |                 |         | AK  | 6  | 7  | 16.67  | Additive     |
|    |                 |         |     |    |    |        |              |
| 11 | 62Valcea spital | IHI S   | IMP | 6  | 9  | 50     | Synergism    |
|    |                 |         | SAM | 13 | 15 | 15.39  | Additive     |
|    |                 |         | MEM | 6  | 8  | 33.33  | Synergism    |
|    |                 |         | CAZ | 6  | 8  | 33.33  | Synergism    |
|    |                 |         | ATM | 10 | 8  | -20    | Antagonism   |
|    |                 |         | FEP | 6  | 8  | 33.33  | Synergism    |
|    |                 |         | CN  | 6  | 7  | 16.67  | Additive     |
|    |                 |         | DOR | 6  | 7  | 16.67  | Additive     |
|    |                 |         | CIP | 6  | 7  | 16.67  | Additive     |
|    |                 |         | AK  | 6  | 7  | 16.67  | Additive     |
|    |                 |         |     |    |    |        |              |
| 38 | 30SPIT TRG      | IHI S   | IMP | 6  | 8  | 33.33  | Synergism    |
|    |                 |         | SAM | 16 | 16 | 0      | Indifference |
|    |                 |         | MEM | 6  | 7  | 16.67  | Additive     |
|    |                 |         | CAZ | 6  | 6  | 0      | Indifference |
|    |                 |         | ATM | 14 | 16 | 14.29  | Additive     |
|    |                 |         | FEP | 12 | 14 | 16.67  | Additive     |
|    |                 |         | CN  | 6  | 8  | 33.33  | Synergism    |
|    |                 |         | DOR | 6  | 8  | 33.33  | Synergism    |
|    |                 |         | CIP | 6  | 7  | 16.67  | Additive     |
|    |                 |         | AK  | 8  | 9  | 12.5   | Additive     |
|    |                 |         |     |    |    |        |              |
| 10 | 21018CNE6       | WWs S   | IMP | 6  | 9  | 50     | Synergism    |
|    |                 |         | SAM | 6  | 9  | 50     | Synergism    |
|    |                 |         | MEM | 6  | 10 | 66.67  | Synergism    |
|    |                 |         | CAZ | 6  | 9  | 50     | Synergism    |
|    |                 |         | ATM | 10 | 8  | -20    | Antagonism   |
|    |                 |         | FEP | 6  | 9  | 50     | Synergism    |
|    |                 |         | CN  | 6  | 8  | 33.33  | Synergism    |
|    |                 |         | DOR | 6  | 7  | 16.67  | Additive     |
|    |                 |         | CIP | 6  | 7  | 16.67  | Additive     |
|    |                 |         | AK  | 6  | 6  | 0      | Indifference |
|    |                 |         |     |    |    |        |              |
| 14 | 21045CNE6       | WWs S   | IMP | 6  | 9  | 50     | Synergism    |
|    |                 |         | SAM | 6  | 10 | 66.67  | Synergism    |
|    |                 |         | MEM | 6  | 8  | 33.33  | Synergism    |

|    |           |       |     |    |    |        |              |
|----|-----------|-------|-----|----|----|--------|--------------|
|    |           |       | CAZ | 6  | 7  | 16.67  | Additive     |
|    |           |       | ATM | 8  | 8  | 0      | Indifference |
|    |           |       | FEP | 6  | 7  | 16.67  | Additive     |
|    |           |       | CN  | 6  | 6  | 0      | Indifference |
|    |           |       | DOR | 6  | 7  | 16.67  | Additive     |
|    |           |       | CIP | 6  | 6  | 0      | Indifference |
|    |           |       | AK  | 6  | 6  | 0      | Indifference |
| 22 | 21049ENE3 | WWs S | IMP | 6  | 9  | 50     | Synergism    |
|    |           |       | SAM | 13 | 13 | 0      | Indifference |
|    |           |       | MEM | 6  | 9  | 50     | Synergism    |
|    |           |       | CAZ | 6  | 8  | 33.33  | Synergism    |
|    |           |       | ATM | 15 | 7  | -53.33 | Antagonism   |
|    |           |       | FEP | 6  | 9  | 50     | Synergism    |
|    |           |       | CN  | 6  | 8  | 33.33  | Synergism    |
|    |           |       | DOR | 6  | 9  | 50     | Synergism    |
|    |           |       | CIP | 6  | 8  | 33.33  | Synergism    |
|    |           |       | AK  | 6  | 9  | 50     | Synergism    |
| 34 | 19015CNE2 | WWs S | IMP | 6  | 8  | 33.33  | Synergism    |
|    |           |       | SAM | 6  | 9  | 50     | Synergism    |
|    |           |       | MEM | 6  | 8  | 33.33  | Synergism    |
|    |           |       | CAZ | 12 | 10 | -16.67 | Antagonism   |
|    |           |       | ATM | 16 | 15 | -6.25  | Antagonism   |
|    |           |       | FEP | 12 | 12 | 0      | Indifference |
|    |           |       | CN  | 6  | 6  | 0      | Indifference |
|    |           |       | DOR | 6  | 8  | 33.33  | Synergism    |
|    |           |       | CIP | 6  | 6  | 0      | Indifference |
|    |           |       | AK  | 6  | 6  | 0      | Indifference |
| 35 | 20030ONE1 | WWs S | IMP | 6  | 9  | 50     | Synergism    |
|    |           |       | SAM | 6  | 9  | 50     | Synergism    |
|    |           |       | MEM | 6  | 8  | 33.33  | Synergism    |
|    |           |       | CAZ | 6  | 7  | 16.67  | Additive     |
|    |           |       | ATM | 9  | 9  | 0      | Indifference |
|    |           |       | FEP | 8  | 7  | -12.5  | Antagonism   |
|    |           |       | CN  | 6  | 7  | 16.67  | Additive     |
|    |           |       | DOR | 6  | 7  | 16.67  | Additive     |
|    |           |       | CIP | 6  | 7  | 16.67  | Additive     |
|    |           |       | AK  | 6  | 7  | 16.67  | Additive     |
| 36 | 22018CA6  | WWs S | IMP | 30 | 30 | 0      | Indifference |
|    |           |       | SAM | 30 | 32 | 6.67   | Additive     |
|    |           |       | MEM | 26 | 32 | 23.08  | Synergism    |
|    |           |       | CAZ | 22 | 24 | 9.09   | Additive     |
|    |           |       | ATM | 22 | 24 | 9.09   | Additive     |
|    |           |       | FEP | 24 | 30 | 25     | Synergism    |
|    |           |       | CN  | 18 | 20 | 11.11  | Additive     |
|    |           |       | DOR | 28 | 30 | 7.14   | Additive     |
|    |           |       | CIP | 30 | 30 | 0      | Indifference |
|    |           |       | AK  | 16 | 16 | 0      | Indifference |
| 37 | 22014CA2  | WWs S | IMP | 6  | 8  | 33.33  | Synergism    |
|    |           |       | SAM | 11 | 15 | 36.36  | Synergism    |
|    |           |       | MEM | 6  | 8  | 33.33  | Synergism    |
|    |           |       | CAZ | 6  | 7  | 16.67  | Additive     |
|    |           |       | ATM | 12 | 13 | 8.33   | Additive     |
|    |           |       | FEP | 13 | 12 | -7.69  | Antagonism   |
|    |           |       | CN  | 16 | 16 | 0      | Indifference |
|    |           |       | DOR | 6  | 7  | 16.67  | Additive     |
|    |           |       | CIP | 6  | 7  | 16.67  | Additive     |

|    |           |       |     |    |    |        |              |
|----|-----------|-------|-----|----|----|--------|--------------|
|    |           |       | AK  | 20 | 22 | 10     | Additive     |
|    |           |       |     |    |    |        |              |
| 39 | 19042CNE3 | WWs S | IMP | 6  | 9  | 50     | Synergism    |
|    |           |       | SAM | 11 | 13 | 18.18  | Additive     |
|    |           |       | MEM | 6  | 7  | 16.67  | Additive     |
|    |           |       | CAZ | 6  | 6  | 0      | Indifference |
|    |           |       | ATM | 13 | 12 | -7.69  | Antagonism   |
|    |           |       | FEP | 12 | 8  | -33.33 | Antagonism   |
|    |           |       | CN  | 9  | 9  | 0      | Indifference |
|    |           |       | DOR | 6  | 9  | 50     | Synergism    |
|    |           |       | CIP | 6  | 9  | 50     | Synergism    |
|    |           |       | AK  | 12 | 13 | 8.33   | Additive     |
|    |           |       |     |    |    |        |              |
| 40 | 19013ONE1 | WWs S | IMP | 8  | 8  | 0      | Indifference |
|    |           |       | SAM | 6  | 11 | 83.33  | Synergism    |
|    |           |       | MEM | 7  | 8  | 14.29  | Additive     |
|    |           |       | CAZ | 6  | 7  | 16.67  | Additive     |
|    |           |       | ATM | 9  | 8  | -11.11 | Antagonism   |
|    |           |       | FEP | 10 | 9  | -10    | Antagonism   |
|    |           |       | CN  | 6  | 10 | 66.67  | Synergism    |
|    |           |       | DOR | 7  | 10 | 42.86  | Synergism    |
|    |           |       | CIP | 6  | 8  | 33.33  | Synergism    |
|    |           |       | AK  | 6  | 8  | 33.33  | Synergism    |
|    |           |       |     |    |    |        |              |
| 41 | 20031ONE5 | WWs S | IMP | 6  | 8  | 33.33  | Synergism    |
|    |           |       | SAM | 10 | 12 | 20     | Synergism    |
|    |           |       | MEM | 6  | 8  | 33.33  | Synergism    |
|    |           |       | CAZ | 6  | 8  | 33.33  | Synergism    |
|    |           |       | ATM | 12 | 11 | -8.33  | Antagonism   |
|    |           |       | FEP | 6  | 8  | 33.33  | Synergism    |
|    |           |       | CN  | 6  | 8  | 33.33  | Synergism    |
|    |           |       | DOR | 6  | 8  | 33.33  | Synergism    |
|    |           |       | CIP | 6  | 8  | 33.33  | Synergism    |
|    |           |       | AK  | 6  | 8  | 33.33  | Synergism    |
|    |           |       |     |    |    |        |              |
| 42 | 19014CNE2 | WWs S | IMP | 6  | 9  | 50     | Synergism    |
|    |           |       | SAM | 14 | 15 | 7.14   | Additive     |
|    |           |       | MEM | 6  | 9  | 50     | Synergism    |
|    |           |       | CAZ | 14 | 14 | 0      | Indifference |
|    |           |       | ATM | 12 | 16 | 33.33  | Synergism    |
|    |           |       | FEP | 10 | 11 | 10     | Additive     |
|    |           |       | CN  | 6  | 7  | 16.67  | Additive     |
|    |           |       | DOR | 6  | 8  | 33.33  | Synergism    |
|    |           |       | CIP | 6  | 7  | 16.67  | Additive     |
|    |           |       | AK  | 6  | 6  | 0      | Indifference |
|    |           |       |     |    |    |        |              |
| 43 | 22019CNE5 | WWs S | IMP | 30 | 34 | 13.33  | Additive     |
|    |           |       | SAM | 26 | 25 | -3.85  | Antagonism   |
|    |           |       | MEM | 24 | 26 | 8.33   | Additive     |
|    |           |       | CAZ | 24 | 20 | -16.67 | Antagonism   |
|    |           |       | ATM | 16 | 17 | 6.25   | Additive     |
|    |           |       | FEP | 24 | 28 | 16.67  | Additive     |
|    |           |       | CN  | 17 | 17 | 0      | Indifference |
|    |           |       | DOR | 26 | 26 | 0      | Indifference |
|    |           |       | CIP | 28 | 28 | 0      | Indifference |
|    |           |       | AK  | 15 | 17 | 13.33  | Additive     |
|    |           |       |     |    |    |        |              |
| 6  | 19012ENE2 | WWs S | IMP | 13 | 11 | -15.39 | Antagonism   |
|    |           |       | SAM | 12 | 15 | 25     | Synergism    |
|    |           |       | MEM | 10 | 11 | 10     | Additive     |
|    |           |       | CAZ | 6  | 8  | 33.33  | Synergism    |

|    |           |       |     |    |    |        |              |
|----|-----------|-------|-----|----|----|--------|--------------|
|    |           |       | ATM | 11 | 9  | -18.18 | Antagonism   |
|    |           |       | FEP | 6  | 6  | 0      | Indifference |
|    |           |       | CN  | 6  | 7  | 16.67  | Additive     |
|    |           |       | DOR | 6  | 8  | 33.33  | Synergism    |
|    |           |       | CIP | 6  | 7  | 16.67  | Additive     |
|    |           |       | AK  | 6  | 7  | 16.67  | Additive     |
| 8  | 21010ONE3 | WWs S | IMP | 6  | 9  | 50     | Synergism    |
|    |           |       | SAM | 6  | 10 | 66.67  | Synergism    |
|    |           |       | MEM | 6  | 9  | 50     | Synergism    |
|    |           |       | CAZ | 6  | 9  | 50     | Synergism    |
|    |           |       | ATM | 13 | 9  | -30.77 | Antagonism   |
|    |           |       | FEP | 6  | 8  | 33.33  | Synergism    |
|    |           |       | CN  | 6  | 7  | 16.67  | Additive     |
|    |           |       | DOR | 6  | 8  | 33.33  | Synergism    |
|    |           |       | CIP | 6  | 7  | 16.67  | Additive     |
|    |           |       | AK  | 6  | 7  | 16.67  | Additive     |
| 5  | 19045ENE5 | SWs S | IMP | 34 | 32 | -5.88  | Antagonism   |
|    |           |       | SAM | 28 | 30 | 7.14   | Additive     |
|    |           |       | MEM | 30 | 32 | 6.67   | Additive     |
|    |           |       | CAZ | 24 | 24 | 0      | Indifference |
|    |           |       | ATM | 20 | 20 | 0      | Indifference |
|    |           |       | FEP | 26 | 26 | 0      | Indifference |
|    |           |       | CN  | 20 | 22 | 10     | Additive     |
|    |           |       | DOR | 26 | 27 | 3.85   | Additive     |
|    |           |       | CIP | 30 | 30 | 0      | Indifference |
|    |           |       | AK  | 18 | 22 | 22.22  | Synergism    |
| 7  | 21012CNE5 | SWs S | IMP | 6  | 9  | 50     | Synergism    |
|    |           |       | SAM | 6  | 10 | 66.67  | Synergism    |
|    |           |       | MEM | 6  | 10 | 66.67  | Synergism    |
|    |           |       | CAZ | 6  | 8  | 33.33  | Synergism    |
|    |           |       | ATM | 6  | 8  | 33.33  | Synergism    |
|    |           |       | FEP | 6  | 8  | 33.33  | Synergism    |
|    |           |       | CN  | 25 | 25 | 0      | Indifference |
|    |           |       | DOR | 6  | 7  | 16.67  | Additive     |
|    |           |       | CIP | 6  | 7  | 16.67  | Additive     |
|    |           |       | AK  | 9  | 12 | 33.33  | Synergism    |
| 12 | 19060ENE2 | SWs S | IMP | 28 | 36 | 28.57  | Synergism    |
|    |           |       | SAM | 28 | 28 | 0      | Indifference |
|    |           |       | MEM | 30 | 30 | 0      | Indifference |
|    |           |       | CAZ | 24 | 28 | 16.67  | Additive     |
|    |           |       | ATM | 23 | 25 | 8.70   | Additive     |
|    |           |       | FEP | 26 | 32 | 23.08  | Synergism    |
|    |           |       | CN  | 20 | 20 | 0      | Indifference |
|    |           |       | DOR | 25 | 30 | 20     | Synergism    |
|    |           |       | CIP | 29 | 30 | 3.45   | Additive     |
|    |           |       | AK  | 20 | 20 | 0      | Indifference |
| 13 | 20070ENE4 | SWs S | IMP | 24 | 25 | 4.17   | Additive     |
|    |           |       | SAM | 14 | 16 | 14.29  | Additive     |
|    |           |       | MEM | 20 | 21 | 5      | Additive     |
|    |           |       | CAZ | 11 | 11 | 0      | Indifference |
|    |           |       | ATM | 12 | 16 | 33.33  | Synergism    |
|    |           |       | FEP | 14 | 16 | 14.29  | Additive     |
|    |           |       | CN  | 6  | 6  | 0      | Indifference |
|    |           |       | DOR | 14 | 16 | 14.29  | Additive     |
|    |           |       | CIP | 6  | 8  | 33.33  | Synergism    |
|    |           |       | AK  | 8  | 10 | 25     | Synergism    |

|    |           |         |     |    |    |          |              |
|----|-----------|---------|-----|----|----|----------|--------------|
|    |           |         |     |    |    |          |              |
| 20 | 19059ENE1 | SWs S   | IMP | 30 | 32 | 6.67     | Additive     |
|    |           |         | SAM | 16 | 22 | 37.5     | Synergism    |
|    |           |         | MEM | 26 | 24 | -7.69    | Antagonism   |
|    |           |         | CAZ | 24 | 26 | 8.33     | Additive     |
|    |           |         | ATM | 21 | 23 | 9.52     | Additive     |
|    |           |         | FEP | 11 | 26 | 136.36   | Synergism    |
|    |           |         | CN  | 20 | 22 | 10       | Additive     |
|    |           |         | DOR | 22 | 25 | 13.64    | Additive     |
|    |           |         | CIP | 28 | 31 | 10.71    | Additive     |
|    |           |         | AK  | 18 | 20 | 11.11    | Additive     |
|    |           |         |     |    |    |          |              |
| 21 | 20069ENE1 | SWs S   | IMP | 7  | 9  | 28.57    | Synergism    |
|    |           |         | SAM | 6  | 12 | 100      | Synergism    |
|    |           |         | MEM | 6  | 9  | 50       | Synergism    |
|    |           |         | CAZ | 6  | 10 | 66.67    | Synergism    |
|    |           |         | ATM | 12 | 10 | -16.67   | Antagonism   |
|    |           |         | FEP | 6  | 10 | 66.67    | Synergism    |
|    |           |         | CN  | 6  | 7  | 16.67    | Additive     |
|    |           |         | DOR | 6  | 10 | 66.67    | Synergism    |
|    |           |         | CIP | 6  | 8  | 33.33    | Synergism    |
|    |           |         | AK  | 6  | 7  | 16.67    | Additive     |
|    |           |         |     |    |    |          |              |
| 16 | 19022CNE4 | WWs C-W | IMP | 6  | 8  | 33.33333 | Synergism    |
|    |           |         | SAM | 13 | 15 | 15.38462 | Additive     |
|    |           |         | MEM | 6  | 8  | 33.33333 | Synergism    |
|    |           |         | CAZ | 6  | 7  | 16.66667 | Additive     |
|    |           |         | ATM | 14 | 14 | 0        | Indifference |
|    |           |         | FEP | 6  | 7  | 16.66667 | Additive     |
|    |           |         | CN  | 6  | 8  | 33.33333 | Synergism    |
|    |           |         | DOR | 6  | 7  | 16.66667 | Additive     |
|    |           |         | CIP | 6  | 7  | 16.66667 | Additive     |
|    |           |         | AK  | 6  | 9  | 50       | Synergism    |
|    |           |         |     |    |    |          |              |
| 17 | 22022CA5  | WWs C-W | IMP | 32 | 32 | 0        | Indifference |
|    |           |         | SAM | 28 | 32 | 14.29    | Additive     |
|    |           |         | MEM | 30 | 32 | 6.67     | Additive     |
|    |           |         | CAZ | 26 | 36 | 38.46    | Synergism    |
|    |           |         | ATM | 20 | 21 | 5        | Additive     |
|    |           |         | FEP | 28 | 24 | -14.29   | Antagonism   |
|    |           |         | CN  | 20 | 21 | 5        | Additive     |
|    |           |         | DOR | 28 | 30 | 7.14     | Additive     |
|    |           |         | CIP | 30 | 33 | 10       | Additive     |
|    |           |         | AK  | 19 | 21 | 10.53    | Additive     |
|    |           |         |     |    |    |          |              |
| 25 | 21001CNE5 | WWs C-W | IMP | 6  | 7  | 16.67    | Additive     |
|    |           |         | SAM | 17 | 20 | 17.65    | Additive     |
|    |           |         | MEM | 6  | 7  | 16.67    | Additive     |
|    |           |         | CAZ | 11 | 13 | 18.18    | Additive     |
|    |           |         | ATM | 15 | 19 | 26.67    | Synergism    |
|    |           |         | FEP | 15 | 16 | 6.67     | Additive     |
|    |           |         | CN  | 6  | 7  | 16.67    | Additive     |
|    |           |         | DOR | 6  | 7  | 16.67    | Additive     |
|    |           |         | CIP | 6  | 6  | 0        | Indifference |
|    |           |         | AK  | 6  | 6  | 0        | Indifference |
|    |           |         |     |    |    |          |              |
| 28 | 22007CA4  | WWs C-W | IMP | 36 | 40 | 11.11    | Additive     |
|    |           |         | SAM | 34 | 34 | 0        | Indifference |
|    |           |         | MEM | 32 | 32 | 0        | Indifference |
|    |           |         | CAZ | 30 | 30 | 0        | Indifference |
|    |           |         | ATM | 22 | 24 | 9.09     | Additive     |

|    |                                 |         |     |    |       |       |              |
|----|---------------------------------|---------|-----|----|-------|-------|--------------|
|    |                                 |         | FEP | 32 | 34    | 6.25  | Additive     |
|    |                                 |         | CN  | 25 | 25    | 0     | Indifference |
|    |                                 |         | DOR | 32 | 32    | 0     | Indifference |
|    |                                 |         | CIP | 32 | 35    | 9.38  | Additive     |
|    |                                 |         | AK  | 23 | 24    | 4.35  | Additive     |
| 15 | 20113ENE3                       | SWs C-W | IMP | 9  | 10    | 11.11 | Additive     |
|    |                                 |         | SAM | 6  | 15    | 150   | Synergism    |
|    |                                 |         | MEM | 6  | 10    | 66.67 | Synergism    |
|    |                                 |         | CAZ | 6  | 7     | 16.67 | Additive     |
|    |                                 |         | ATM | 10 | 12    | 20    | Synergism    |
|    |                                 |         | FEP | 11 | 12    | 9.09  | Additive     |
|    |                                 |         | CN  | 6  | 7     | 16.67 | Additive     |
|    |                                 |         | DOR | 6  | 7     | 16.67 | Additive     |
|    |                                 |         | CIP | 6  | 8     | 33.33 | Synergism    |
|    |                                 |         | AK  | 6  | 7     | 16.67 | Additive     |
| 23 | 19051ENE2                       | SWs C-W | IMP | 32 | 34    | 6.25  | Additive     |
|    |                                 |         | SAM | 28 | 30    | 7.14  | Additive     |
|    |                                 |         | MEM | 22 | 28    | 27.27 | Synergism    |
|    |                                 |         | CAZ | 22 | 26    | 18.18 | Additive     |
|    |                                 |         | ATM | 20 | 22.24 | 11.2  | Additive     |
|    |                                 |         | FEP | 26 | 28    | 7.69  | Additive     |
|    |                                 |         | CN  | 19 | 21    | 10.53 | Additive     |
|    |                                 |         | DOR | 24 | 29    | 20.83 | Synergism    |
|    |                                 |         | CIP | 30 | 32    | 6.67  | Additive     |
|    |                                 |         | AK  | 18 | 21    | 16.67 | Additive     |
| 24 | 22006CA3                        | SWs C-W | IMP | 30 | 34    | 13.33 | Additive     |
|    |                                 |         | SAM | 28 | 32    | 14.29 | Additive     |
|    |                                 |         | MEM | 30 | 32    | 6.67  | Additive     |
|    |                                 |         | CAZ | 26 | 28    | 7.69  | Additive     |
|    |                                 |         | ATM | 21 | 21    | 0     | Indifference |
|    |                                 |         | FEP | 24 | 30    | 25    | Synergism    |
|    |                                 |         | CN  | 23 | 22    | -4.35 | Antagonism   |
|    |                                 |         | DOR | 25 | 36    | 44    | Synergism    |
|    |                                 |         | CIP | 28 | 32    | 14.29 | Additive     |
|    |                                 |         | AK  | 19 | 22    | 15.79 | Additive     |
| 26 | 20056CNE2                       | SWs C-W | IMP | 6  | 9     | 50    | Synergism    |
|    |                                 |         | SAM | 14 | 13    | -7.14 | Antagonism   |
|    |                                 |         | MEM | 6  | 8     | 33.33 | Synergism    |
|    |                                 |         | CAZ | 6  | 6     | 0     | Indifference |
|    |                                 |         | ATM | 15 | 14    | -6.67 | Antagonism   |
|    |                                 |         | FEP | 10 | 11    | 10    | Additive     |
|    |                                 |         | CN  | 6  | 7     | 16.67 | Additive     |
|    |                                 |         | DOR | 6  | 8     | 33.33 | Synergism    |
|    |                                 |         | CIP | 6  | 11    | 83.33 | Synergism    |
|    |                                 |         | AK  | 6  | 6     | 0     | Indifference |
|    | <i>P. aeruginosa</i> ATCC 27853 |         | IMP | 24 | 23    | -4.17 | Antagonism   |
|    |                                 |         | TZP | 28 | 30    | 7.14  | Additive     |
|    |                                 |         | ATM | 27 | 26    | -3.70 | Antagonism   |
|    |                                 |         | FEP | 30 | 28    | -6.67 | Antagonism   |
|    |                                 |         | CAZ | 28 | 28    | 0     | Indifference |
|    |                                 |         | AK  | 23 | 23    | 0     | Indifference |
|    |                                 |         | CN  | 20 | 20    | 0     | Indifference |
|    |                                 |         | DOR | 33 | 30    | -9.09 | Antagonism   |
|    |                                 |         | CIP | 33 | 32    | -3.03 | Antagonism   |
|    |                                 |         | MEM | 6  | 7     | 16.67 | Additive     |



IMP (imipenem), 10 µg; TZP (piperacillin-tazobactam), 85 µg; ATM (aztreonam), 30 µg; FEP (cefepime), 30 µg; CAZ (ceftazidime), 30 µg; MEM (meropenem), 10 µg; CIP (ciprofloxacin), 5 µg; SAM (ampicillin-sulbactam), 20 µg; AK (amikacin), 30 µg; DOR (doripenem), 10 µg; CN (gentamicin), 10 µg; %, percentage; IZD, inhibition zone diameter.
